# Supplementary material
Source: PubMed Central journal article supplement (PMC4531374)
Supplement: NIHMS712585-supplement-Supp_Fig_1-9__Table_S-1_and_References.pdf [file NIHMS712585-supplement-Supp_Fig_1-9__Table_S-1_and_References.pdf]

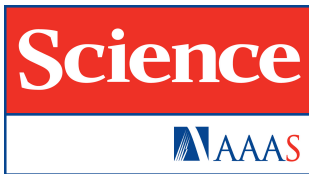

## Supplementary Materials for

### **Helminth Infection Reactivates Latent $\gamma$ -herpesvirus Via Cytokine Competition at a Viral Promoter**

T.A. Reese<sup>1</sup>, B.S. Wakeman<sup>2</sup>, H.S. Choi<sup>3#</sup>, M.M. Hufford<sup>4#</sup>, S.C. Huang<sup>1</sup>, X. Zhang<sup>1</sup>, M.D. Buck<sup>1</sup>, A. Jezewski<sup>1</sup>, A. Kambal<sup>1</sup>, C.Y. Liu<sup>1</sup>, G. Goel<sup>5</sup>, P.J. Murray<sup>6</sup>, R.J. Xavier<sup>5,&</sup>, M.H. Kaplan<sup>4,&</sup>, R. Renne<sup>3,&</sup>, S.H. Speck<sup>2,&</sup>, M.N. Artyomov<sup>1</sup>, E.J. Pearce<sup>1</sup> and H.W. Virgin<sup>1,\*</sup>

correspondence to: virgin@wustl.edu

#### **This PDF file includes:**

Materials and Methods  
Figs. S1 to S9  
Table S1  
References (31-52)

## Materials and Methods

**Mice, Infections, and Injections.** Mice were infected with MHV68 between 7 and 10 weeks of age. C57BL6/J, R26-stop-eYFP (B6.129X1-Gt(ROSA)26Sor<sup>tm1(EYFP)Cos</sup>/J), Stat6KO(31), and Yarg (B6.129S4-Arg1<sup>tm1Lky</sup>/J)(17) mice were purchased from Jackson and maintained in our specific pathogen free mouse colony at Washington University. R26-stop-tdRFP(16), PPAR $\gamma$  f/f x Lysozyme M-cre(32), Arginase-1 f/f x Tie2-cre(31, 33); Stat1KO(34); have been previously described. Yarg mice were crossed with R26-stop-tdRFP mice to generate double reporter mice, Yarg/R26-stop-RFP.

MHV68 (WUSM strain), MHV68-M3-FL(14), and MHV68-cre were administered intranasally ( $1 \times 10^5$  pfu) or intraperitoneally ( $1 \times 10^6$  pfu). 200 L3 larvae of *H. polygyrus* were administered by oral gavage 42 days after MHV68 infection. Mice were sensitized by intraperitoneal injection 2500 *Sm* eggs and then challenged 14 day later with 5000 eggs given intravenously(32, 35). *Sm* eggs lodge in the lung parenchyma following intravenous re-challenge(35). *Listeria monocytogenes* ( $1 \times 10^5$  cfu) was administered intraperitoneally. 250 mg of anti-IFN $\gamma$  (clone H22)(25) or isotype control (clone PIP) was injected intraperitoneally on day 42 of MHV68 infection. For long-lasting IL-4 complexes, 5 mg of IL-4 (Peprotech) and 25 mg of anti-IL-4 (BioXcell, clone 11B11) were complexed as described(26) prior to injection into mice on days 42 and 44 after MHV68 infection. To quantify virus-encoded luciferase expression, mice were infected with MHV68-M3-FL(14), weighed and injected with 150 mg/kg of D-Luciferin (Calipur LifeSciences) prior to imaging using an Xenogen IVIS 200 (Calipur LifeSciences). Total flux (photons/second) of either the abdominal region or the entire mouse was determined using Living Image software (Xenogen)(14).

**Construction of MHV68-cre virus.** Cre-recombinase sequence with an engineered intron to prevent expression of cre in bacterial cells was cloned into a vector containing the ubiquitin C promoter (UbC-cre) (pUB6/V5-His, Invitrogen), and then ligated into a vector such that it was flanked by translational insulator sequences on either side of the transgene (pBluescriptKS+/ins-UbC-cre). The transgene was amplified by PCR with primers containing 70 bp homology arms, gel purified, and used for recombination using lambda-Red mediated recombination and *galK*/kanamycin positive/negative selection described previously(36, 37). Transgene was inserted into position 55215 of BAC-MHV68, a kind gift of Ulrich Koszinowski(38, 39). MHV68-cre DNA was transfected into NIH3T12 cells and resulting virus passaged in NIH3T12 cells. Self-excision of the loxP flanked BAC sequence was confirmed by loss of GFP expression (contained within the BAC sequence) and restriction digest.

**Flow cytometric analysis and sorting of virus-infected cells.** Peritoneal cells from 8-10 mice were harvested by lavage, pooled, and blocked with 10% mouse serum. Cells selected with CD11b MicroBeads (Miltenyi Biotec) were analyzed or sorted after staining with antibodies: CD11b-PerCP-Cy5.5 (clone M1/70, BioLegend), F4/80-APC-Alexa Fluor 750 (clone BM8, Invitrogen), CD19-PE-Cy7 (clone 1D3, BD Pharmigen).

For analysis cells were also stained with CD206-PE (clone C068C2, BioLegend), CD301-Alexa Fluor 647 (clone ER-MP23, AbD Serotec). Cells were sorted into Trizol Reagent (Invitrogen). 1000 to 2000 cells were obtained from each sort. RNA was quantified using Qubit RNA assay kits (Invitrogen). All of the RNA from virus-pos cells and 50 ng of RNA from virus-neg cells was prepared for RNA-seq using ScriptSeq v2 RNA-seq library preparation kit (Epicentre). Index Primers (Epicentre) were added and samples underwent Duplex-Specific thermostable nuclease (DSN) (Evrogen) treatment to remove ribosomal RNA. Samples were pooled and sequenced on HiSeq.

**RNA-seq processing and comparative expression analysis.** Sequencing reads were trimmed at the 3' end to mitigate an effect of C addition by template-switching enzyme used for preparation of small-input libraries. Then, data were aligned using Tophat(40) to mm9 assembly of mouse genome and expression of genes scored by using Cufflinks(41). Top 9000 expressed genes (representing stably expressed fraction of transcriptome) were used to create ranked list ordered by the differential expression between RFP positive (virus-positive) and RFP negative (virus-negative) macrophages. This list was then used to compare our data against external signatures by means of pre-ranked Gene Set Enrichment Analysis (GSEA)(42). Specifically, M1/M2 specific signatures were obtained using publicly available dataset in Gene Expression Omnibus – GSE21895 – that profiled murine bone-marrow derived macrophages at different conditions including IL-4 (M2) and LPS+IFN $\gamma$  (M1) stimulations. M1 and M2 specific signatures were derived by looking at top 400 differentially expressed genes that were upregulated in M1 and top 400 differentially expressed genes that were upregulated in M2. Query genes common between datasets are listed in Supplementary Table 1.

**Bone marrow-derived macrophage cultures and infections.** BMDMs were harvested from C57BL6/J mice and differentiated for 7 days with 10% CMG-14 supernatants(43) in complete Dulbecco's modified Eagle's medium (DMEM) (10% FCS, 1% HEPES, 2mM L-glutamine). At day 7  $1.5 \times 10^5$  cells were plated/well in 24-well plates, rested for 2-3 days cells, pretreated with cytokines (IL-4 (Peprotech) 10 ng/ml unless otherwise noted, IL-13 (Peprotech) 50 ng/ml, IL-5 (Peprotech) 50 ng/ml, IFN $\gamma$  (R&D Systems) doses indicated in legends) or 200 mM Etomoxir (Sigma Aldrich) for 16 hours, infected with MHV68 (multiplicity of infection (MOI)=5, one hour), washed, and resuspended in media containing cytokines. Cells were harvested for FACS 24 hours after infection. Infected macrophages were fixed with 4% formaldehyde, blocked with 10% mouse serum and 1% Fc Block (CD16/32, BioLegend), then stained with polyclonal rabbit antibody to MHV68(44, 45) (1:1000), followed by secondary goat anti-rabbit Alexa Fluor-647 (Invitrogen). For viral growth cells were infected, frozen, and then titered on NIH 3T12 cells as described(27).

**RT-PCR.** BMDMs were treated with 10 ng/ml IL-4 and/or IFN $\gamma$  at indicated doses for 16 hours, subsequently infect with MHV68 (MOI=5), and RNA were prepared using Trizol (Invitrogen) 24 hours later for RT-PCR analysis of *gene 50* and *Gapdh* as

described(3). For expression of *Arg1*, *Relma/Fizz1*, *Nos2*, and *Eif2b1* Taqman probes from Applied Biosystems were used.

**Promoter Luciferase assays.** RAW 264.7 cells were transfected with LT-1 transfection reagent (Mirus) according to manufactures instructions. 6 well plates were seeded with  $1 \times 10^6$  RAW 264.7 cells 24 hours prior to transfection in complete DMEM (10% FCS, 2mM L-glutamine, 100 U/ml of streptomycin, 100 U/ml of penicillin). 2.5  $\mu$ g of reporter plasmid was tranfected (pGL4.10[Luc] was used as a negative control, pGL4.13[Luc] was used as a positive control, and the green fluorescent protein pMaxGFP was used to determine transfection efficiency). For assays in which IL-4, IL-13 or IFN $\gamma$  was used, 24 hours post transfection 10 ng/ml IL-4, 10 ng/ml IL-13 or 1 ng/ml IFN $\gamma$  was added to each well. All cells were collected 48 hours post transfection and lysed. Luciferase assays were performed using 50 ml lab made luciferase agent (1.5 mM HEPES, pH 8, 0.4 mM DTT, 10.6 mM ATP, 80 mM MgSO<sub>4</sub>, 5.4 mM Coenzyme A, 2 mM EDTA, and 9.4 mM beetle Luciferin) and 10 ml of lysed cells from each condition. Luciferase assays were read using a TD-20/20 luminometer (Turner Biosystems). All transfections were repeated in triplicate and presented as a fold over empty pGL4.10 vector ratio.

**Reporter Plasmids Construction.** Promoters were amplified from WT MHV68 DNA and cloned into the pGL4.10[luc2] (Promega) luciferase plasmid. The E1 proximal promoter was amplified with forward primer E1-410F (5'-gatcggctagctctttataggtaccagggaa-3') and reverse primer E1-410R (5'-gatcgaagctggtcacatctgacagagaaa-3'); the E0 distal promoter was amplified with forward primer E0-250F (5'-gatcggctagcttaatcctatatggagat-3') and reverse primer E0ATGR (5'-gatcgaagcttgctgctgggttgtaag-3'); the N3 promoter was amplified with forward primer N3FNhe1 (5'- agtcgctagctcaggatgcagttaagca-3') and reverse primer N3RBgl2 (5'-cgatagatctagcctgggcatagtctt-3'); the N4/N5 promoter was amplified with forward primer N4\_N5F1000Nhe1 (5'- agtcgctagcaatcgtccggggggttaa-3') and reverse primer N4\_N5RBgl2 (5'- cgatagatctaagccgtggtcagcaggt-3'). Point mutation in promoters were introduced by PCR and confirmed by sequencing.

**Ex vivo limiting dilution assay (LDA) for latency and persistent replication.** Reactivation from latency and preformed virus was assayed as described(27). Briefly, peritoneal exudate cells (PECs) or splenocytes were plated in 2-fold serial dilutions (24-wells per dilution) onto permissive mouse embryonic fibroblast (MEF) monolayers (maintained in DMEM with 10% FCS), and scored for cytopathic effect (CPE) 3 weeks later. Cells that reactivate and produce virus will lead to complete CPE of a well by this time. To distinguish preformed infectious virus in the sample from virus that reactivates *ex vivo* from live cells, parallel samples of PECs were mechanically disrupted to kill the cells, but keep any infectious virus intact. These samples were plated on parallel plates of MEFs and scored for cytopathic effect. By plating 2-fold serial dilutions of cells we can determine the frequency of 1 reactivation event per well. The 63.2% Poisson

distribution line represents the frequency at which one reactivation event is likely to have occurred per well.

**Limiting Dilution (LD)-PCR to detect viral genome.** To compare the frequency of cells harboring viral genome, PECs and splenocytes were assayed by nested PCR for viral genome as described(5). 63.2% Poisson distribution line represents the frequency at which one genome was detected per well.

**Western Blot analysis.** BMDMs were collected in laemmli buffer and analyzed as previously described(45).

**Stat6 ChIP.** ChIP assay was performed as previously described(46). Immunoprecipitations were performed with rabbit polyclonal antibodies (control IgG or Stat6 [M-200])(Santa Cruz Biotechnology Inc.). Quantification of binding DNA was performed with SYBR Green Fast PCR Master Mix using the ABI 7500 Fast Real-time PCR System (both from Applied Biosystems). N4/N5 primers were as follows: (forward) 5' GCC-GTC-CCT-TAT-CTA-CAG-TCA 3' and (reverse) 5' CTA-TCA-TGG-GGG-CCA-GGC 3'. VEGF primers were as follows: (forward) 5' CGG-GAT-TGC-ACG-GAA-ACT-TTT-CGT 3' and (reverse) 5' CTC-CCT-TCT-GGA-ACC-GAG-GCC 3'. To quantify immunoprecipitated DNA, a standard curve was generated from serial dilutions of input DNA. To calculate ChIP results as a percentage of input, the amount of the immunoprecipitated DNA from the IgG control was subtracted from the amount of the immunoprecipitated DNA from the Stat6 antibody, followed by normalizing against the amount of the input DNA.

**KSHV gene expression.** BCBL-1 cells were cultured as previously described(47). At indicated times post IL-4 or 12-O-tetradecanoylphorbol 13-acetate (TPA) treatment, total RNA was extracted using RNA-Bee (Tel-Test) according to the manufacturer's instructions. RNA was reverse transcribed using SuperScript III (Invitrogen) according to the manufacturer's suggestions. Quantitative PCR (qPCR) analysis was carried out using an ABI StepOne Plus system along with ABI Fast SYBR reagent (Applied Biosystems, Carlsbad, CA). Expression of all genes was normalized to GAPDH expression. Primers are as follows: Orf57 FWD-ACGAATCGAGGGACGACG, REV-CGGGTTTCGGACAATTGCT(48); Orf45 FWD-GCTTTGCGGCTTAAGTTTGG, REV- CGCCTCCTCTGGTAGCGA(48); RTA FWD-CACAAAATGGCGCAAGATGA, REV-TGGTAGAGTTGGGCCTTCAGTT(49); Orf59 FWD-TTAGAAGTGGAAGGTGTGCC, REV-TCCTGGAGTCCGGTATAGAATC(50); Orf19 FWD-GGCGAAAAGTCAGCGGTGGT, REV-CGGCGCGTCTTCCCTAAAGA(51); GAPDH FWD- CCCCTGGCCAAGGTCATCCA, REV-ACAGCCTTGGCAGCGCCAGT(52).

**KSHV isolation and quantitation.** Virus particles were harvested from PEL cells at indicated times post IL-4 treatment. After clearing from cellular debris, media supernatant was passed through a 0.45  $\mu$ M filter. Virus particles were then pelleted by ultra-centrifugation using a Beckman SW-40 rotor at 100,000 x g for 1 hr. Virus pellets were resuspended and DNA was extracted using DNazole (Molecular Research Center, Inc.). Viral genome copy number was determined by qPCR assay for LANA N-terminus (FWD- GCGCCCTTAACGAGAGGAAGTT, REV- TTCCTTCGCGGTTGTAGATG) using a serial diluted LANA expression plasmid as a standard curve.

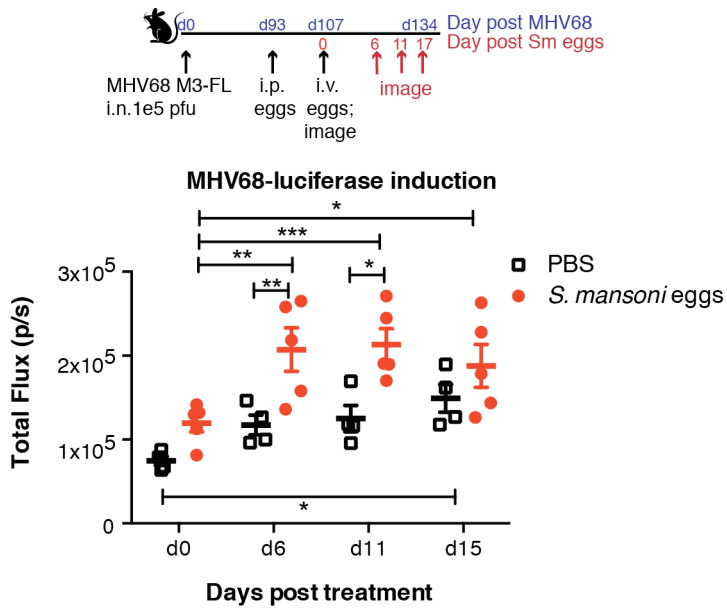

**Fig. S1. Reactivation of MHV68 upon treatment with *Sm* eggs over 100 days after MHV68 infection.** Mice infected with MHV68-M3-FL were challenged according to the timecourse depicted above with *Sm* eggs more than 3 months after infection with MHV68. Luciferase expression was measured. Each symbol represents an individual mouse. \* p<0.05, \*\* p<0.01, \*\*\* p<0.001 by 2-way repeated measures ANOVA with Tukey's and Bonferroni's post-test.

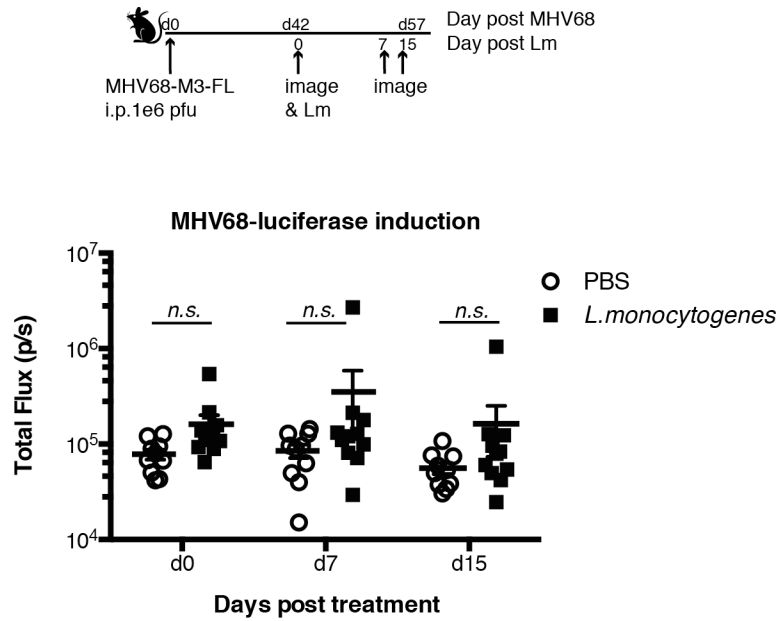

**Fig. S2. *L. monocytogenes* does not reactivate MHV68.** Mice were infected with MHV68-M3-FL for 42 days, and challenged with *L. monocytogenes*. Mice were imaged for luciferase expression either directly before infection with *L. monocytogenes* (d0) or at the indicated days after *L. monocytogenes* infection (d7 and d15). Total flux was quantitated. Two independent experiments were done and symbols are individual mice, bars are the means, and error bars are standard error. Neither time nor treatment was significant by 2-way repeated measures ANOVA. n.s. not significant.



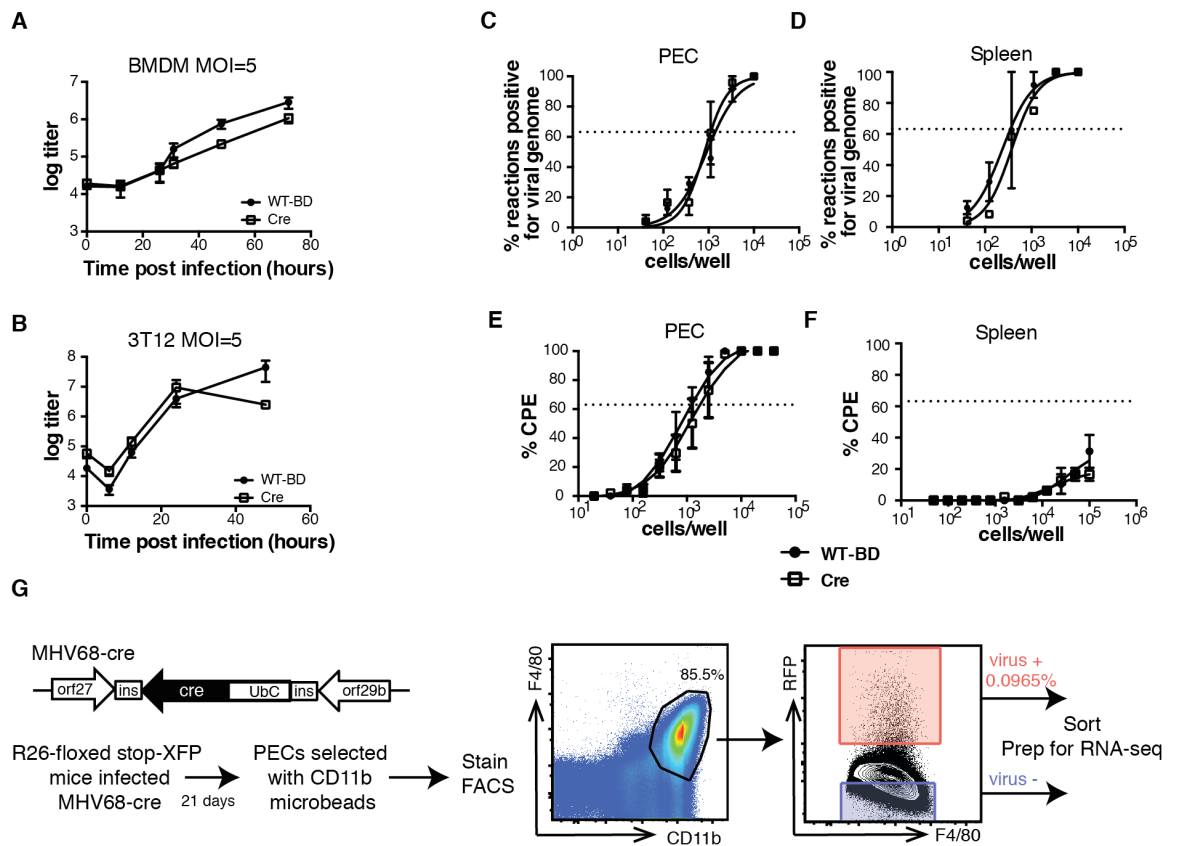

**Fig. S3. Characterization of MHV68-cre virus and design of RNAseq experiment.** (A) Growth curve of infected BMDMs comparing WT-BAC-derived (WT-BD) virus with MHV68-cre. Three independent experiments. (B) Growth curves of WT-BD and MHV68-cre in NIH3T12 cells. Three independent experiments. (C-D) Limiting dilution (LD)-PCR analysis at day 16 of PECs (C) or splenocytes (D) from mice infected intraperitoneally with either WT-BD (wild type MHV68 BAC derived) or MHV68-cre. Data points indicate the percentage of wells that were positive by nested-PCR for MHV68 gene 50 over a set of serial dilutions of cells. 12-24 wells per dilution were assayed. (E-F) Limiting dilution assay (LDA) for frequency of reactivation from latency of PECs (E) or splenocytes (F). Percent of wells that have cytopathic effect (CPE) was plotted against number of cells that were added per well. 24 wells per dilution were scored. Dotted horizontal lines represent 63.2% Poisson distribution. Parts C-F represent 2 independent experiments. (G) Diagram of MHV68-cre and sorting analysis of virus-positive and virus-negative cells from R26-stop-XFP mice infected i.p. with MHV68-cre. Peritoneal cells (PECs) were harvested as a source of infected macrophages. Three independent experiments were performed in each of which cells from at least eight mice were pooled and sorted as shown. Open reading frame (orf), insulator sequence (Ins), Ubiquitin C promoter (UbC).

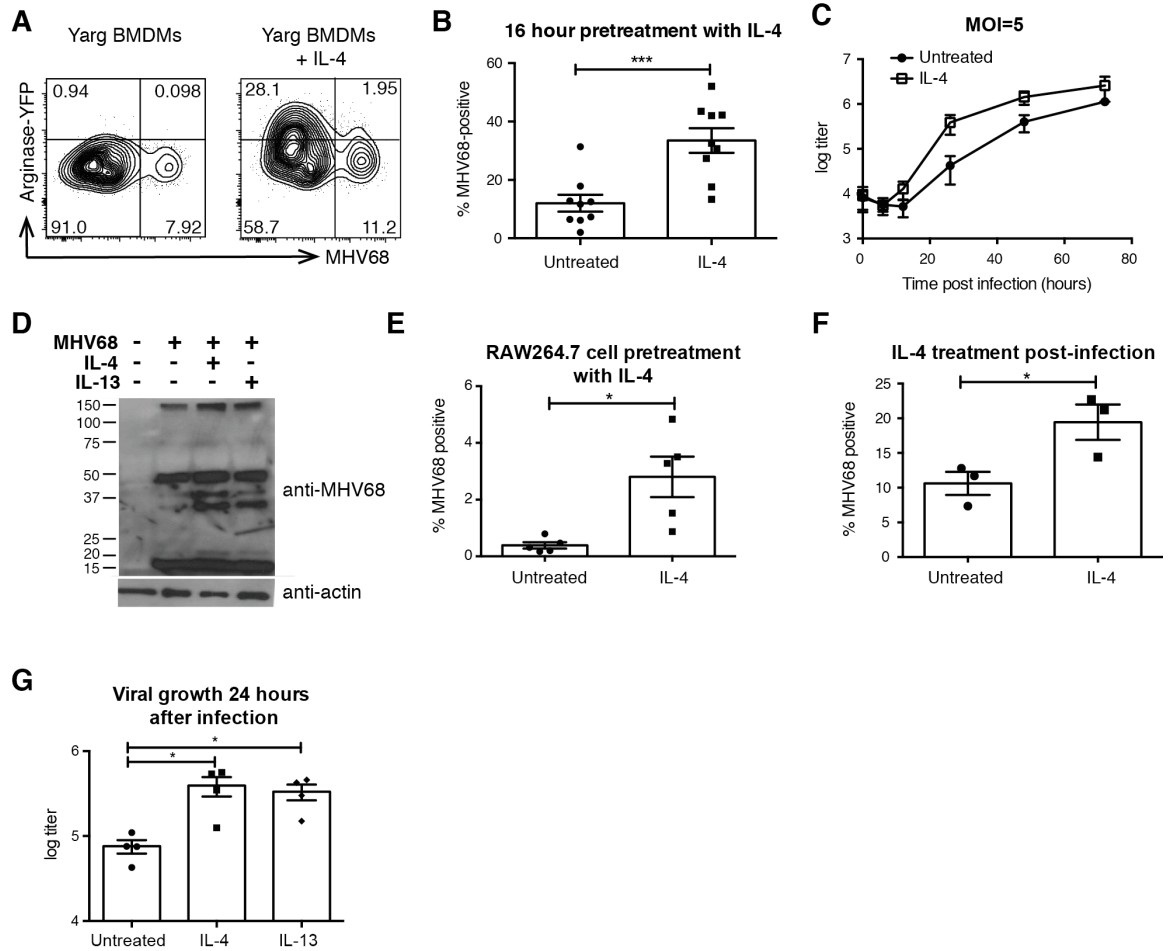

**Fig. S4. IL-4 promotes virus replication in BMDMs and RAW264.7 cells.** (A) Yarg BMDMs were either untreated or treated with IL-4 and infected with MHV68 at a multiplicity of infection (MOI)=5. Cells were analyzed 24 hours by flow cytometry for MHV68 lytic antigen expression and YFP (arginase) expression. (B) BMDMs were pretreated with IL-4 for 16 hours then infected with MHV68 at MOI=5. 24 hours later cells were analyzed by FACS as in Fig. 3A for expression of MHV68 lytic viral antigens. Shown is the average across multiple experiments of MHV68-positive cells. (C) BMDMs were treated with IL-4 and infected with MHV68 at a MOI=5. Viral titer was determined by plaque assay at the indicated timepoints. (D) BMDMs were treated with IL-4 or IL-13 and infected with MHV68 as in B. Lysates were analyzed by Western for expression of MHV68 proteins. (E) RAW264.7 macrophages were pretreated with IL-4 and infected with MHV68 for 24 hours. Cells were analyzed by flow cytometry for expression of MHV68 lytic viral proteins. (F) BMDMs were infected with MHV68. After virus inoculum was washed off, IL-4 was added to the cultures. Cells were analyzed 24 hours later by flow cytometry for expression of lytic viral proteins. (G) BMDMs were treated with either IL-4 or IL-13 and infected at an MOI=5. Viral titer was determined by plaque assay 24 hours after infection. In B, E - G symbols represent individual experiments. \*  $p < 0.05$  by t test.

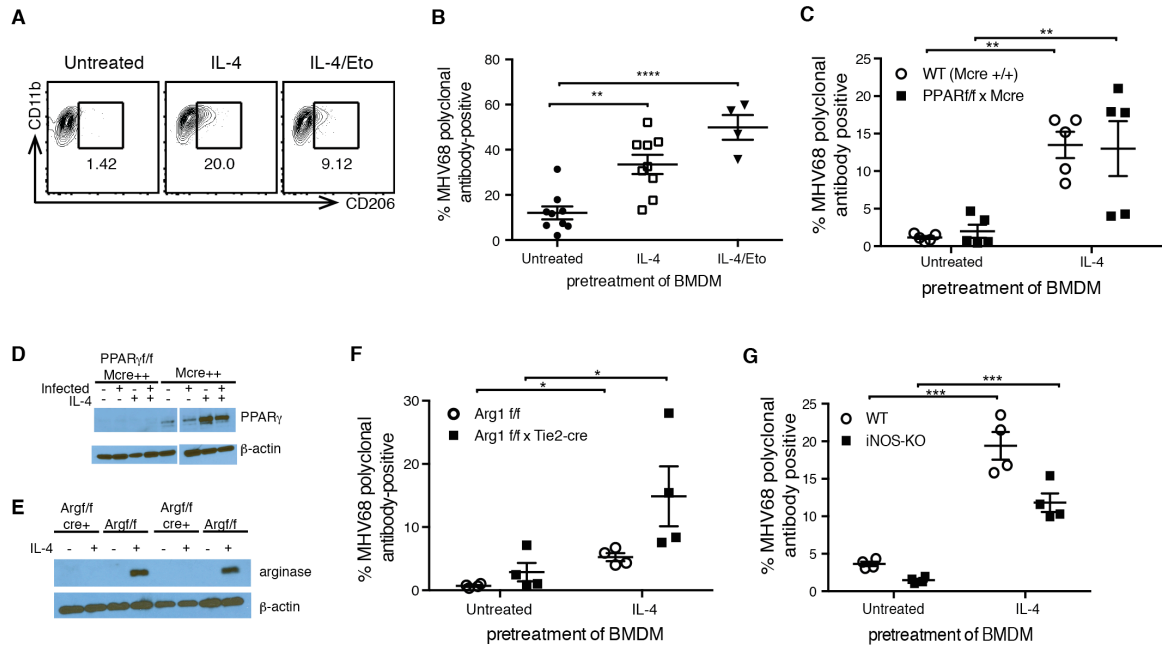

**Fig. S5. Pathways involved in alternative macrophage activation are not required for IL-4-induced increase in MHV68 replication.** (A-B) BMDMs were pretreated with either IL-4 (10ng/ml) or IL-4/Etomoxir (Eto)(200mM). Cells were infected with MHV68 and analyzed by flow cytometry for CD206 (A) and MHV68 infection (B) 24 hours later. (C) PPAR $\gamma$  f/f x Lysozyme M (Mcre) BMDMs and WT (Mcre++) BMDMs were infected and stained as in (A). (D) Deletion of PPAR $\gamma$  was confirmed by western blot of BMDM lysates. (E-F) Arginase-1 (Arg1) f/f x Tie2 cre and WT (Arg f/f) BMDMs were infected and stained as in (A). (E) Deletion of arginase-1 was confirmed by western blot of BMDM lysates. (F) Flow cytometric analysis of MHV68 infection as in (A). (G) iNOS-deficient BMDMs were treated and stained as in (A). For B, C, F, and G percentage of cells that were positive for MHV68 staining is plotted. Symbols in graphs represent individual experiments. \*  $p < 0.05$ , \*\*  $p < 0.01$ , \*\*\* $p < 0.001$ , \*\*\*\*  $p < 0.0001$  by either one-way ANOVA or two-way ANOVA with Sidak's multiple comparison test.

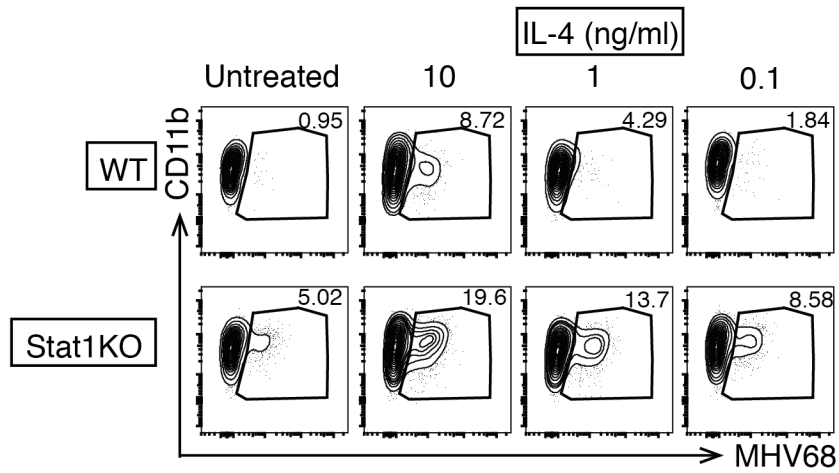

**Fig. S6. Stat1 is not required for IL-4 induced MHV68 replication.** Stat1KO or WT BMDMs were pretreated with IL-4 and then infected with MHV68. 24 hours later cells were analyzed for MHV68 infection by flow cytometry. Represents two independent experiments.

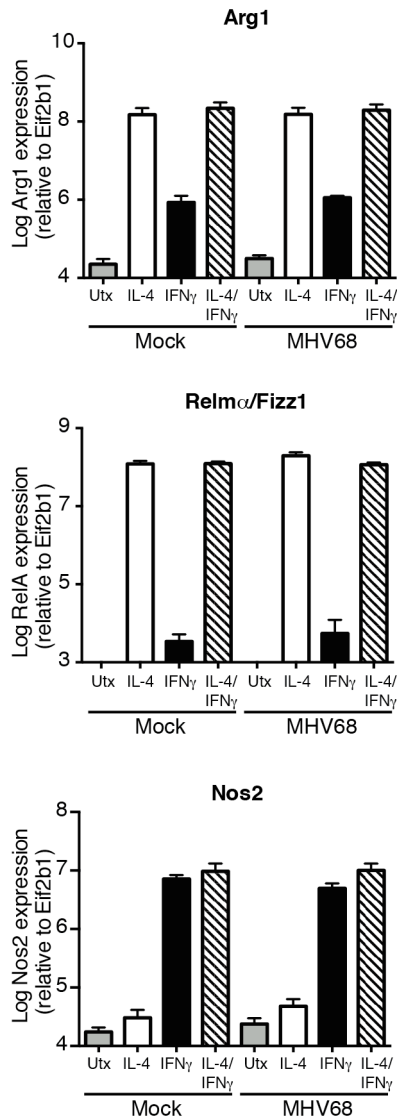

**Figure S7. Gene expression analysis of BMDMs treated with IL-4 and IFN $\gamma$ .** BMDMs were treated with IL-4, IFN $\gamma$ , or a combination of the two prior to infection with MHV68 at MOI=5. 24-hours later RNA was harvested and gene expression analysis was performed to quantitate expression of Arginase-1 (Arg1), Resistin-like molecule alpha (Relm $\alpha$ /Fizz1), and Nitric oxide synthase-2, inducible (Nos2). Expression was normalized to Eif2b1. Data represents 3 independent experiments.

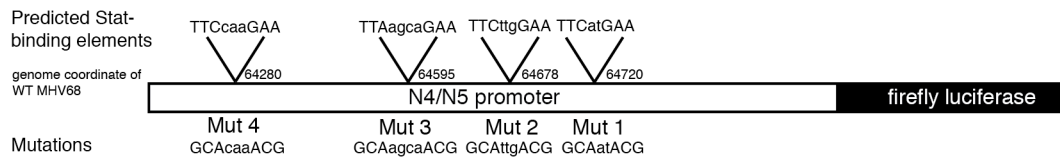

**Fig. S8. Schematic of N4/N5 luciferase construct with potential Stat-binding mutants.**

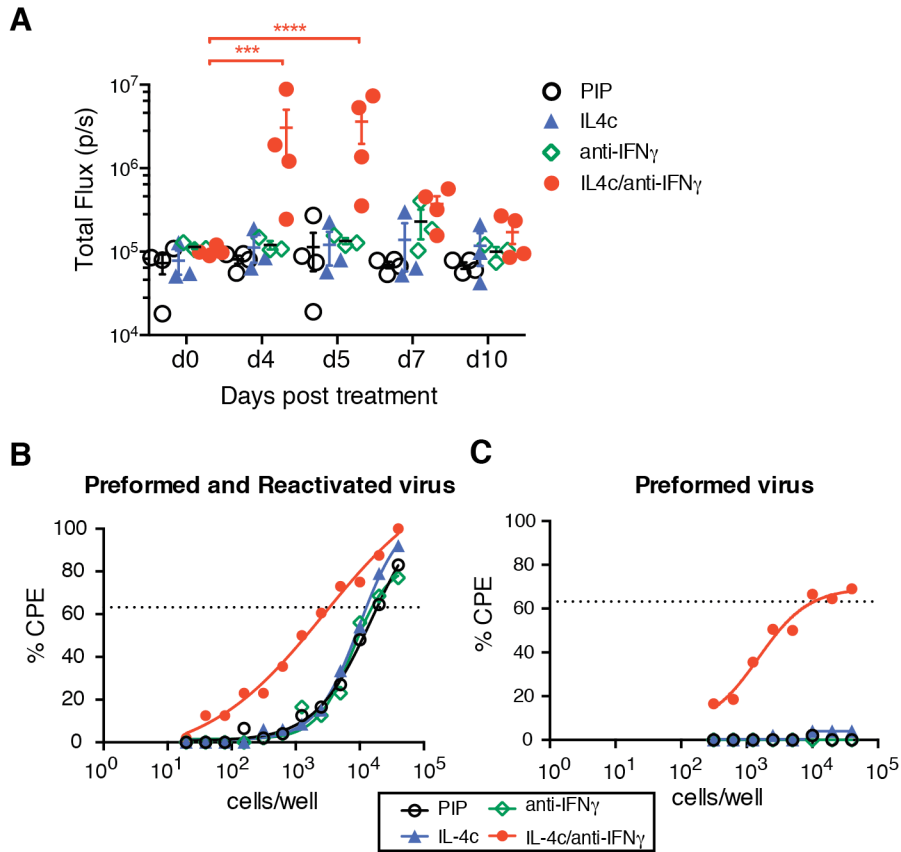

**Fig. S9. Timecourse and LDA analysis of anti-IFN $\gamma$ /IL4c-induced reactivation of MHV68.** (A) Mice were infected with MHV68-M3-FL. 42 days later mice were imaged for luciferase expression (d0) and received isotype control (PIP), anti-IFN $\gamma$ , IL4 complexes (IL4c), or anti-IFN $\gamma$  plus IL4c. Mice were imaged on the indicated days for luciferase expression and total flux (photons/second) was measured in the abdominal region. Symbols are individual mice from one experiment. (B) Live PECs were isolated from 3 mice per experiment in a), pooled, and plated in 2-fold serial dilutions on MEF monolayers. CPE from 24-wells per dilution was counted and plotted against the number of cells per well. (C) Parallel samples to those in (B) were disrupted to kill cells but keep preformed virus intact, and were plated as in (B). \*\*\* $p < 0.001$ , \*\*\*\* $p < 0.0001$  by 2-way repeated measures ANOVA and Tukey's post-test. For LDA analysis: Fit curve represents a sigmoidal dose response curve with variable slope. Dotted horizontal line represents 63.2% Poisson distribution. One representative experiment of two is shown.

**Table S1. M1 and M2 signatures in virus-pos and virus-neg macrophages.**  
List of differentially expressed genes in virus-pos and virus-neg macrophages that overlap with M1 and M2 signatures (table included at the end of the file).



**Supplementary Table 1: M1 and M2 signatures in virus-pos and virus-neg macrophages.**

| <b>M1 signature genes overlapping with virus-pos</b> | <b>M2 signature genes overlapping with virus-neg</b> |
|------------------------------------------------------|------------------------------------------------------|
| 1110018G07Rik                                        | 1500031L02Rik                                        |
| 1110038F14Rik                                        | 1810034E14Rik                                        |
| 1190005F20Rik                                        | 1810063B05Rik                                        |
| 1810029B16Rik                                        | 2310003L22Rik                                        |
| 2010106G01Rik                                        | 3110001D03Rik                                        |
| 2010109K11Rik                                        | 4930455F23Rik                                        |
| 3110001I22Rik                                        | 5830432E09Rik                                        |
| 3110003A17Rik                                        | 6230427J02Rik                                        |
| 4933426M11Rik                                        | 9830001H06Rik                                        |
| A530032D15Rik                                        | Aagab                                                |
| Acot9                                                | Abhd14b                                              |
| Acp2                                                 | Acap3                                                |
| Acsl1                                                | Acot2                                                |
| Adar                                                 | Acp6                                                 |
| Adora2a                                              | Actr6                                                |
| Aftph                                                | Acy1                                                 |
| Agrn                                                 | Acyp1                                                |
| AI607873                                             | Adcy9                                                |
| Akna                                                 | Add3                                                 |
| Ankrd33b                                             | Aimp2                                                |
| Ap3m2                                                | AK3                                                  |
| Arfgap3                                              | Ak8                                                  |
| Arhgef3                                              | Akr1c12                                              |
| Arl4a                                                | Alkbh7                                               |
| Ass1                                                 | Amacr                                                |
| AW112010                                             | Ang                                                  |
| Axl                                                  | Ank                                                  |
| B2m                                                  | Ankmy2                                               |
| Batf                                                 | Ap1b1                                                |
| Batf2                                                | Arg1                                                 |
| Bbip1                                                | Arhgap39                                             |
| BC006779                                             | Arl15                                                |
| BC013712                                             | Arntl                                                |
| Bcl2a1b                                              | B230118H07Rik                                        |
| Bcl3                                                 | Batf3                                                |
| Bcl9                                                 | Bcs1l                                                |
| Bcor                                                 | Brwd1                                                |
| Birc3                                                | Btbd2                                                |
| C130026I21Rik                                        | Btbd6                                                |
| C1s                                                  | C130050O18Rik                                        |
| C4b                                                  | C2cd2l                                               |
| Calcl                                                | Cbr2                                                 |
| Casp1                                                | Ccdc88c                                              |
| Casp4                                                | Ccl24                                                |
| Ccdc25                                               | Ccnf                                                 |
| Ccdc88b                                              | Cd163                                                |
| Ccl3                                                 | Cd200r1                                              |
| Ccl4                                                 | Cd24a                                                |
| Ccl5                                                 | Cd300lb                                              |
| Ccr12                                                | Cd300lg                                              |
| Cd14                                                 | Cdan1                                                |
| Cd2ap                                                | Cdc25b                                               |
| Cd40                                                 | Cdc42ep3                                             |
| Cds1                                                 | Cdk4                                                 |
| Cebpb                                                | Cebpa                                                |
| Cenpj                                                | Chek2                                                |
| Cfb                                                  | Chst12                                               |
| Cflar                                                | Ckap2                                                |
| Clcn7                                                | Clec10a                                              |
| Clec4e                                               | Cluap1                                               |
| Cmpk2                                                | Cox7a1                                               |
| Cpne3                                                | Csgalnact2                                           |

| M1-cont.      | M2- cont. |
|---------------|-----------|
| Crif3         | Dars2     |
| Csmp1         | Ddx31     |
| Cxcl10        | Ddx59     |
| Cxcl2         | Deptor    |
| Cxcl9         | Dhx37     |
| Cycs          | Dna2      |
| D14Ert668e    | Dnalc4    |
| Daam1         | Dnmbp     |
| Daxx          | Dok2      |
| Dcp2          | Dolpp1    |
| Dnajb6        | Dym       |
| Dram1         | Dyrk3     |
| Dusp1         | Echs1     |
| Eapp          | Enpp1     |
| Ebi3          | Ephx1     |
| Ehd1          | Eps8      |
| Eif4g3        | F13a1     |
| Eli2          | Fam117a   |
| Enpp4         | Fam195a   |
| Etnk1         | Fam43a    |
| Fam26f        | Fam58b    |
| Fam82a2       | Fam63a    |
| Fas           | Fam65a    |
| Flnb          | Fam98c    |
| Fnbp11        | Fcrls     |
| Fpr1          | Fgfr1     |
| Frmd4a        | Fh1       |
| Ftsjd2        | Fli1      |
| Fyb           | Foxred2   |
| Gadd45a       | Gab3      |
| Gbp4          | Galc      |
| Gbp5          | Galnt9    |
| Gbp6          | Gamt      |
| Gbp9          | Gapt      |
| Gca           | Gas6      |
| Gch1          | Gfer      |
| Gfpt1         | Gins3     |
| Ggct          | Glcci1    |
| Gm12185       | Glod4     |
| Gm12250       | Glit25d1  |
| Gm14446       | Gng10     |
| Gm4951        | Gpn3      |
| Gm6377        | Gramd4    |
| Gpd2          | H2afj     |
| Gpr18         | Hadh      |
| Gtf2b         | Haus8     |
| Gtpbp2        | Hdac10    |
| H2-M3         | Hebp1     |
| H2-Q8         | Hfe       |
| H2-T22        | Hist1h2af |
| Hck           | Hist1h2ai |
| Herc6         | Hist1h2ak |
| Hinfp         | Hrsp12    |
| Hipk1         | Hspe1     |
| Hspbap1       | Idh1      |
| I830012O16Rik | Idh2      |
| Icam1         | Ifi2711   |
| Ifi203        | Igf1      |
| Ifi204        | Imp3      |
| Ifih1         | Inpp5a    |
| Ifit1         | Kdelc2    |
| Ifit2         | Kif23     |
| Ifitm3        | Klhdc2    |
| Ifnar2        | Kihl17    |

## M1-cont.

Ifit57  
 Igtf  
 Iigp1  
 Ikbke  
 Il12rb1  
 Il15ra  
 Il1a  
 Il1b  
 Il27  
 Inpp5b  
 Irak2  
 Irg1  
 Irgm1  
 Irgm2  
 Isg20  
 Itga5  
 Itgal  
 Jam2  
 Kdm4a  
 Kif3c  
 Klf6  
 Klra2  
 Larp1  
 Lcp2  
 Leng9  
 Lmo4  
 Lnpep  
 Lpar1  
 Lrch1  
 Lrp10  
 Lrrc25  
 Lrrc4  
 Ly6a  
 Ly6c2  
 Ly6i  
 Lztf1  
 M6pr  
 Mafk  
 March5  
 Marcks1  
 Mgat4a  
 Miki  
 Mmp14  
 Mnda  
 Mocs1  
 Mrpl52  
 Ms4a4c  
 Ms4a6b  
 Mtmr14  
 Mtmr6  
 Mtus1  
 Mx1  
 Myd88  
 N4bp1  
 Ncf1  
 Nckap1  
 Ncoa7  
 Nfkbia  
 Nfkbib  
 Nfkbie  
 Nfkbiz  
 Nktr  
 Nlrc5  
 Nod1

## M2-cont.

Ldlrad3  
 Limk1  
 Lmnb1  
 Loh12cr1  
 Lpin1  
 Ltb4r1  
 Lyl1  
 Mafb  
 Mctp1  
 Mettl13  
 Mgl2  
 Miip  
 Mrc1  
 Mrpl42  
 Mrps35  
 Nat8l  
 Ndufa12  
 Nt5dc3  
 Nth1  
 Nudcd2  
 Nudt2  
 Olfm1  
 Oxct1  
 Oxnad1  
 Paip2b  
 Paox  
 Paqr7  
 Pcbd2  
 Pccb  
 Pcyox1l  
 Pdcd4  
 Pde12  
 Pdlim1  
 Pecr  
 Peo1  
 Phlda3  
 Phf1  
 Plekhf1  
 Plekhg3  
 Plxnc1  
 Polr2h  
 Polr3gl  
 Pot1a  
 Pparg  
 Prkdc  
 Prkrir  
 Prpsap2  
 Psmg2  
 Ptgr1  
 Ptgs1  
 Rab19  
 Rab3il1  
 Rasa3  
 Retnla  
 Rgs10  
 Rnase4  
 Rnf130  
 Rpa3  
 Rpl10a  
 Rprd1b  
 Samd1  
 Sesn1  
 Slc45a4  
 Slc46a3

| M1-cont.  | M2-cont. |
|-----------|----------|
| Nod2      | Smarca2  |
| Nt5c3     | Smc4     |
| Nup98     | Sulf2    |
| Oasl1     | Sult1a1  |
| Oasl2     | Surf2    |
| Optn      | Susd3    |
| Otud1     | Taco1    |
| Parp10    | Tarsl2   |
| Parp14    | Tdp1     |
| Parp8     | Tdp2     |
| Pkfb3     | Tfrc     |
| Pgs1      | Tiam1    |
| Phf11     | Tiam2    |
| Pilra     | Timm17b  |
| Pilrb1    | Timm8b   |
| Pla2g16   | Tm7sf3   |
| Plagl2    | Tmem126b |
| Pld2      | Tmem18   |
| Plekhh3   | Tmem37   |
| Plscr1    | Tmem64   |
| Pml       | Tmem81   |
| Pnp       | Tob1     |
| Ppm1k     | Tprkb    |
| Ppp4r2    | Trim47   |
| Prdx5     | Tspan5   |
| Prpf39    | Vat1     |
| Psmb9     | Vkorc1   |
| Pstpip2   | Xrcc3    |
| Ptges     | Yeats2   |
| Ptpn1     | Zfand1   |
| Pttg1     | Zfp101   |
| Pydc4     | Zfp161   |
| Rab10     | Zfp511   |
| Rab11fip1 | Zfp706   |
| Rab20     | Zfp81    |
| Rab22a    | Zfyve21  |
| Rab32     | Zmat3    |
| Rap1b     |          |
| Rapgef2   |          |
| Rasa4     |          |
| Rc3h1     |          |
| Relb      |          |
| Rhou      |          |
| Riok3     |          |
| Ripk2     |          |
| Rnf114    |          |
| Rnf135    |          |
| Rnf14     |          |
| Rnf31     |          |
| Saa3      |          |
| Sav1      |          |
| Sbds      |          |
| Scarf1    |          |
| Senp1     |          |
| Serpina3f |          |
| Serpina3g |          |
| Serpib9   |          |
| Sh3bp4    |          |
| Skil      |          |
| Slamf7    |          |
| Slamf8    |          |
| Slc11a1   |          |
| Slc16a10  |          |
| Slc25a12  |          |

## M1-cont.

Slc25a37  
Slc26a2  
Slc28a2  
Slc2a6  
Slc31a2  
Slc3a2  
Slco3a1  
Slfn3  
Slfn4  
Slfn8  
Snx18  
Snx20  
Socs3  
Sod2  
Sp100  
Spata13  
Spata2  
Sqstm1  
St3gal1  
Stard3  
Stat2  
Stat3  
Stx11  
Stx8  
Stxbp1  
Tagap1  
Tbrg4  
Tcirg1  
Tdrd7  
Tgs1  
Tgtp1  
Tle3  
Tlk2  
Tlr2  
Tlr3  
Tmcc3  
Tmem131  
Tmem2  
Tnf  
Tnfaip2  
Tnfaip3  
Tnfrsf1b  
Tnfsf10  
Tnip1  
Tnip3  
Tor1aip2  
Traf1  
Traf3ip2  
Trex1  
Trim21  
Trim25  
Txn1  
Uba7  
Ube2f  
Ube2l6  
Usp15  
Usp18  
Vav1  
Vrk2  
Wdfy1  
Whamm  
Xaf1  
Xkr8  
Ythdf1

M1-cont.

Zbp1  
Zc3h12a  
Zc3h12c  
Zc3h7a  
Zc3hav1  
Zcchc2  
Zcchc6  
Zfp106  
Zfp281  
Zfp800  
Zfp821  
Znfx1  
Znrf1  
Zufsp

---
